# Supplementary material
Source: PubMed Central journal article supplement (PMC2977999)
Supplement: NIHMS246404-supplement-Supplementary_Data.pdf [file NIHMS246404-supplement-Supplementary_Data.pdf]

## Appendix A. Supplementary data

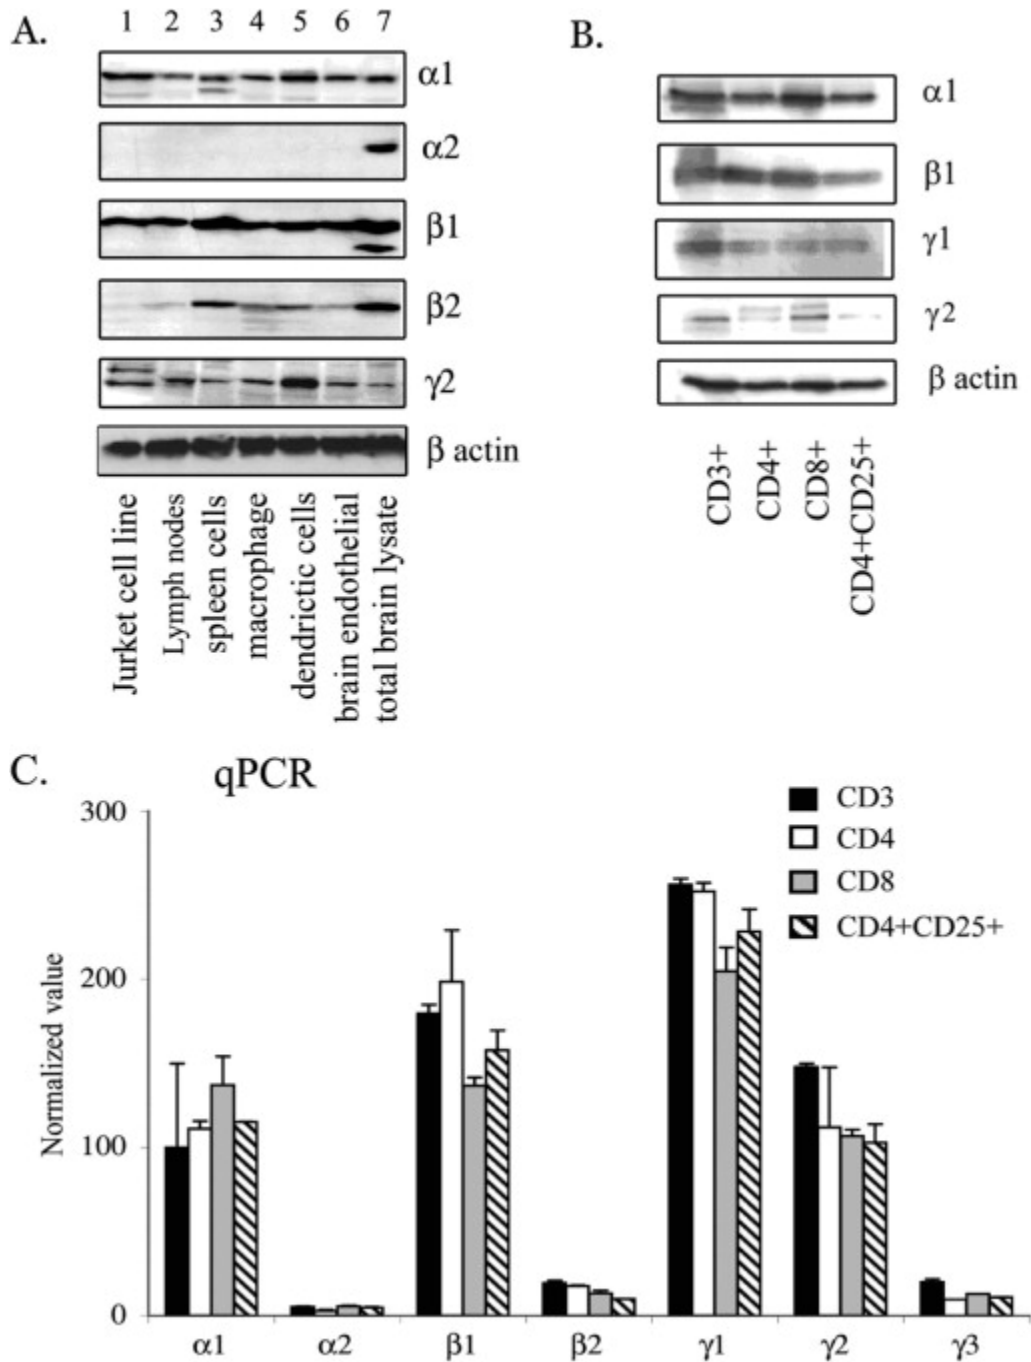

Supplementary Fig. 1.

### AMPK kinase assay

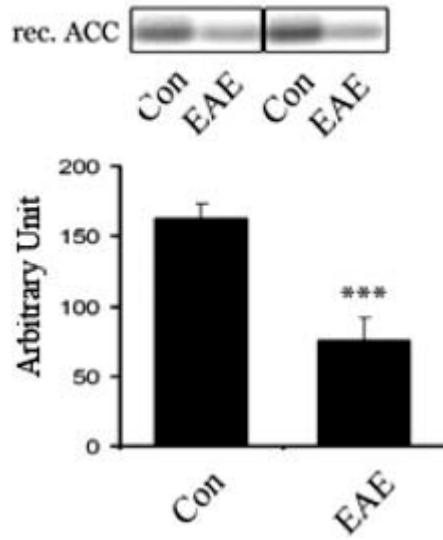

Supplementary Fig. 2.

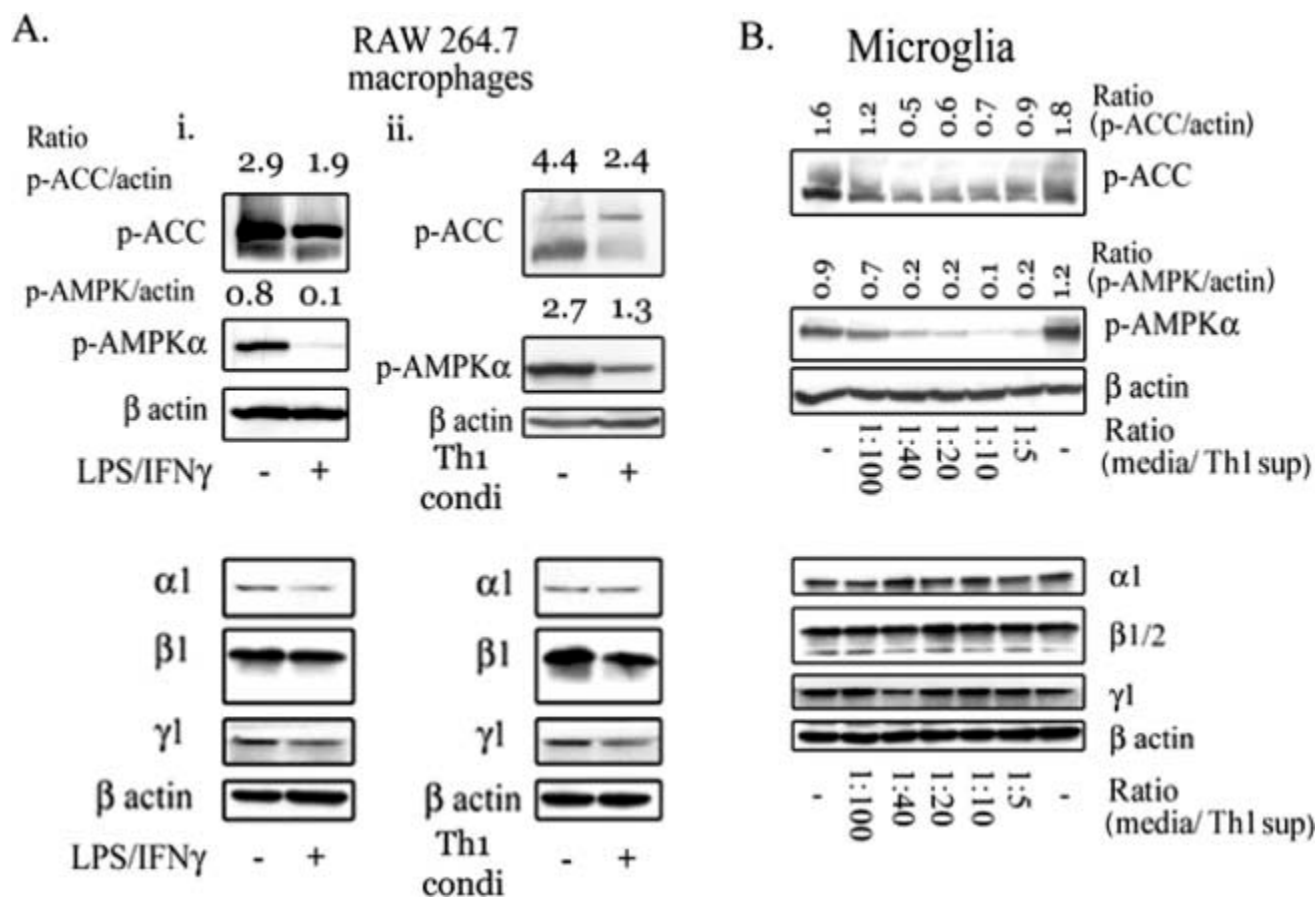

Supplementary Fig. 3.

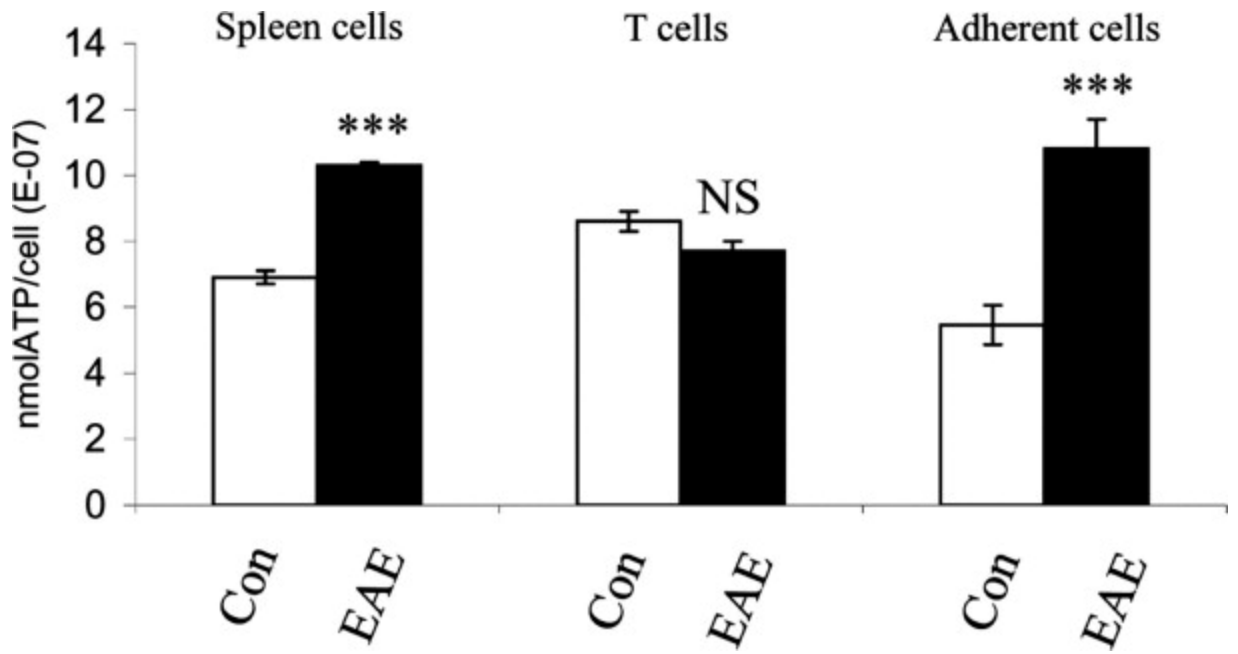

Supplementary Fig. 4.

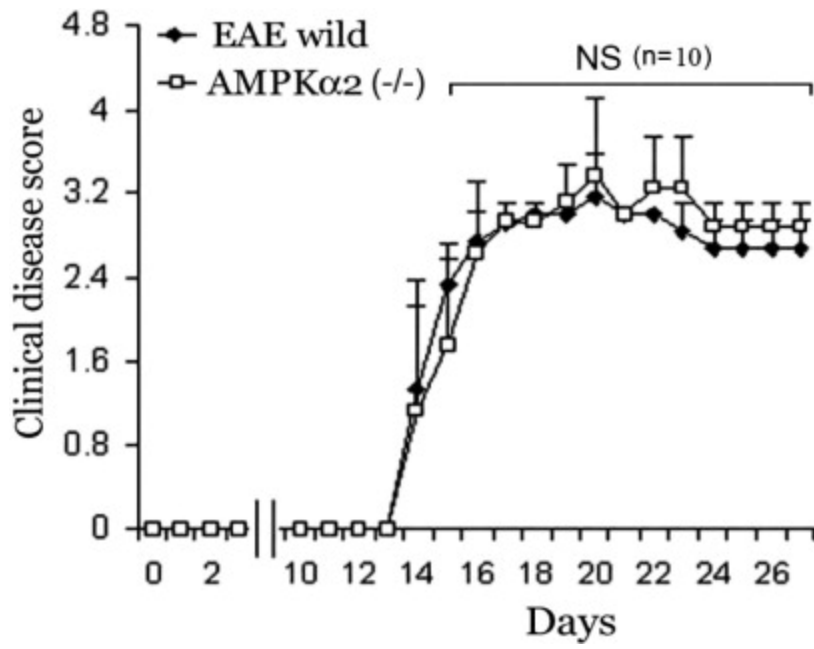

Supplementary Fig. 5.
